# Supplementary material for: Linking groundwater travel times to stream chemistry, isotopic composition and catchment characteristics
Source: Copernicus journal article supplement (doi:10.5194/hess-2020-121), 2020-04-01
Supplement: Supplementary file 1 [file hess-2020-121-supplement.zip]

**Supporting information 1 – Statistics of travel time distribution and field observations**

Here we display more information regarding the travel time distribution of groundwater calculated from particle tracking of 1000 years. The results are shown in table S1. The table include both non-transformed and lognormal transformed data. Approximately 2.0 million particles were released the first simulated year, and at the end of the calculation 55 % had entered the stream network, and less than 1 % of the particles were still left in the model. The skew, standard deviation (SD), standard error of the mean (SEM) is based on the non-transformed data set.

**Table S1 Statistics of particle tracking Test 2.** Statistics of particle tracking results, weekly release calculation time 1000 years. The statistics are calculated for each sub-catchment, including the artesian mean, the back-transformed artesian mean of the lognormal distribution (Geometric mean) and the confidence interval.

|     | Arithmetic<br>mean | Q1  | Q2  | Q3   | Skew | SD   | SEM | Geometric<br>mean | Confidence<br>interval |     |
|-----|--------------------|-----|-----|------|------|------|-----|-------------------|------------------------|-----|
|     | y                  | y   | y   | y    |      |      |     | y                 | y                      |     |
| C1  | 10.8               | 0.3 | 0.8 | 2.6  | 3.8  | 26.3 | 0.2 | 1.1               | 1.1                    | 1.2 |
| C2  | 1.8                | 0.2 | 0.4 | 1.0  | 6.2  | 5.2  | 0.1 | 0.5               | 0.4                    | 0.5 |
| C4  | 5.0                | 0.3 | 1.0 | 2.7  | 9.3  | 15.5 | 0.3 | 1.1               | 1.1                    | 1.2 |
| C5  | 5.7                | 0.4 | 0.9 | 1.9  | 11.3 | 25.3 | 0.2 | 1.0               | 1.0                    | 1.1 |
| C6  | 6.1                | 0.3 | 0.9 | 2.1  | 10.8 | 23.2 | 0.2 | 1.0               | 1.0                    | 1.0 |
| C7  | 7.6                | 0.3 | 0.9 | 6.4  | 4.6  | 16.6 | 0.2 | 1.3               | 1.3                    | 1.4 |
| C9  | 11.3               | 0.4 | 1.0 | 9.5  | 5.7  | 28.4 | 0.1 | 1.6               | 1.6                    | 1.7 |
| C10 | 9.3                | 0.4 | 1.0 | 3.9  | 7.3  | 26.4 | 0.1 | 1.3               | 1.3                    | 1.3 |
| C12 | 11.9               | 0.4 | 1.0 | 7.8  | 5.5  | 29.3 | 0.1 | 1.6               | 1.6                    | 1.7 |
| C13 | 10.6               | 0.4 | 1.0 | 6.1  | 7.0  | 28.8 | 0.1 | 1.5               | 1.4                    | 1.5 |
| C14 | 17.4               | 0.8 | 3.6 | 14.2 | 8.7  | 47.2 | 0.1 | 3.2               | 3.2                    | 3.3 |
| C15 | 12.7               | 0.4 | 1.2 | 11.5 | 7.3  | 30.8 | 0.1 | 1.9               | 1.9                    | 1.9 |
| C16 | 14.5               | 0.7 | 2.9 | 12.9 | 9.9  | 37.9 | 0.0 | 2.8               | 2.8                    | 2.8 |
| C20 | 22.1               | 0.7 | 2.7 | 27.1 | 8.0  | 50.2 | 0.3 | 3.6               | 3.5                    | 3.7 |

<sup>a</sup> The confidence interval is based on the log-normal distribution and is calculated as:

Confidence level= $Z \cdot \sigma / \sqrt{n}$

Z=confidence coefficient based on alpha/2 whereas alpha=0.05,  $\sigma$ =standard deviation and n=sample size

In this section we also display more information about the winter (table S1b) and yearly (table S1c) chemistry data of the streams in Krycklan, including isotope data, base cation (BC) concentration and pH. Note that the BC constitutes approximately of 40-50 % Ca, 5-10 % K, 5-10 % Mg and 25-35 % Na. The isotopic signature was calculated according to:

$$\delta = \left( \frac{R_{sample}}{R_{standard}} - 1 \right) * 1000\text{‰} , \text{ whereas } R = \frac{^{18}O}{^{16}O} \text{ or } R = \frac{^2H}{^1H} \quad (\text{Eq. S1})$$

**Table S1b: Winter chemistry data.** Extended statistics of isotope and average chemistry data for all sites in Krycklan.

| $\delta^{18}\text{O}^{\text{a}}$ - winter |       |       |       |     |       | $\delta^2\text{H}^{\text{b}}$ winter |       |        |       |      |      |
|-------------------------------------------|-------|-------|-------|-----|-------|--------------------------------------|-------|--------|-------|------|------|
| %o                                        | Mean  | Min   | Max   | SD  | SEM   | %o                                   | Mean  | Min    | Max   | SD   | SEM  |
| C1                                        | -13.0 | -13.5 | -12.3 | 0.3 | 0.05  | C1                                   | -93.4 | -97.2  | -90.1 | 2.0  | 0.38 |
| C2                                        | -12.8 | -13.6 | -10.7 | 0.6 | 0.11  | C2                                   | -93.2 | -98.0  | -85.4 | 2.6  | 0.48 |
| C4                                        | -12.9 | -13.7 | -11.8 | 0.5 | 0.08  | C4                                   | -93.9 | -99.5  | -87.7 | 3.1  | 0.57 |
| C5                                        | -12.9 | -14.1 | -11.8 | 0.6 | 0.10  | C5                                   | -93.1 | -100.8 | -87.4 | 3.5  | 0.65 |
| C6                                        | -13.0 | -13.8 | -11.7 | 0.5 | 0.08  | C6                                   | -93.8 | -99.5  | -86.9 | 2.7  | 0.50 |
| C7                                        | -13.0 | -13.6 | -12.5 | 0.3 | 0.05  | C7                                   | -94.1 | -98.1  | -90.5 | 1.9  | 0.35 |
| C9                                        | -13.0 | -14.0 | -12.2 | 0.4 | 0.07  | C9                                   | -94.3 | -100.3 | -89.7 | 2.4  | 0.44 |
| C10                                       | -13.2 | -13.7 | -12.4 | 0.3 | 0.05  | C10                                  | -95.8 | -99.8  | -92.0 | 1.9  | 0.35 |
| C12                                       | -13.1 | -13.7 | -12.4 | 0.3 | 0.06  | C12                                  | -95.1 | -99.2  | -91.4 | 2.1  | 0.40 |
| C13                                       | -13.1 | -13.7 | -12.6 | 0.3 | 0.05  | C13                                  | -95.1 | -98.7  | -91.3 | 1.8  | 0.34 |
| C14                                       | -13.4 | -13.9 | -12.9 | 0.2 | 0.05  | C14                                  | -97.3 | -100.5 | -94.3 | 1.5  | 0.24 |
| C15                                       | -13.3 | -13.9 | -11.6 | 0.4 | 0.08  | C15                                  | -96.6 | -100.8 | -90.8 | 2.3  | 0.37 |
| C16                                       | -13.4 | -14.4 | -11.9 | 0.4 | 0.08  | C16                                  | -97.5 | -104.5 | -92.0 | 2.1  | 0.39 |
| C20                                       | (-)   | (-)   | (-)   | (-) | 0.05  | C20                                  | (-)   | (-)    | (-)   | (-)  | 0.38 |
| P                                         | -13.5 | -30.4 | -1.6  | 4.6 |       | P                                    | -99.0 | -226.3 | -26.4 | 34.6 |      |
| Base cations <sup>c</sup> winter          |       |       |       |     |       | pH - winter                          |       |        |       |      |      |
| ( $\mu\text{eq/L}$ )                      | Mean  | Min   | Max   | SD  | SEM   | (-)                                  | Mean  | Min    | Max   | SD   | SEM  |
| C1                                        | 277   | 210   | 349   | 34  | 7.61  | C1                                   | 5.7   | 5.2    | 6.1   | 0.3  | 0.06 |
| C2                                        | 257   | 175   | 593   | 99  | 19.48 | C2                                   | 5.3   | 4.8    | 5.7   | 0.3  | 0.06 |
| C4                                        | 250   | 179   | 428   | 40  | 8.13  | C4                                   | 4.4   | 4.1    | 4.9   | 0.2  | 0.05 |
| C5                                        | 257   | 193   | 311   | 16  | 3.87  | C5                                   | 4.7   | 4.3    | 5.2   | 0.2  | 0.05 |
| C6                                        | 321   | 239   | 452   | 42  | 8.79  | C6                                   | 5.7   | 5.0    | 6.2   | 0.3  | 0.07 |
| C7                                        | 271   | 225   | 399   | 33  | 7.54  | C7                                   | 5.3   | 4.7    | 5.9   | 0.3  | 0.08 |
| C9                                        | 350   | 273   | 487   | 48  | 10.84 | C9                                   | 6.1   | 5.4    | 6.4   | 0.3  | 0.06 |
| C10                                       | 315   | 247   | 419   | 35  | 7.81  | C10                                  | 5.8   | 5.2    | 6.4   | 0.3  | 0.08 |
| C12                                       | 319   | 259   | 413   | 35  | 7.66  | C12                                  | 6.1   | 5.6    | 6.5   | 0.3  | 0.06 |
| C13                                       | 338   | 262   | 462   | 50  | 10.58 | C13                                  | 5.7   | 5.3    | 6.4   | 0.2  | 0.05 |
| C14                                       | 358   | 303   | 419   | 32  | 6.93  | C14                                  | 6.5   | 6.3    | 6.8   | 0.1  | 0.03 |
| C15                                       | 347   | 292   | 432   | 34  | 7.27  | C15                                  | 6.5   | 6.2    | 6.7   | 0.1  | 0.03 |
| C16                                       | 481   | 349   | 601   | 61  | 12.95 | C16                                  | 6.6   | 6.4    | 7.0   | 0.1  | 0.03 |
| C20                                       | 520   | 420   | 723   | 58  | 12.66 | C20                                  | 6.6   | 6.4    | 6.9   | 0.1  | 0.03 |
| P                                         | 70    | 4     | 1214  | 145 |       | P                                    | (-)   | (-)    | (-)   | (-)  |      |

<sup>a</sup> Average winter isotope signature, sub-catchments with lakes have been adjusted according to equation 1

<sup>b</sup> Average winter isotope signature, sub-catchments with lakes have been adjusted according to equation 2

<sup>c</sup> Average winter cation signature, sub-catchments been mire adjusted according to equation 3

**Table S1c: Yearly stream chemistry data**

| Base cations <sup>a</sup> yearly<br>( $\mu\text{eq/L}$ ) |      |     |      |     |       | pH - yearly |      |     |     |     |      |
|----------------------------------------------------------|------|-----|------|-----|-------|-------------|------|-----|-----|-----|------|
|                                                          | Mean | Min | Max  | SD  | SEM   | (-)         | Mean | Min | Max | SD  | SEM  |
| <b>C1</b>                                                | 258  | 101 | 452  | 39  | 7.61  | <b>C1</b>   | 5.4  | 4.6 | 6.8 | 0.3 | 0.03 |
| <b>C2</b>                                                | 229  | 72  | 1353 | 99  | 19.48 | <b>C2</b>   | 5.0  | 4.4 | 5.9 | 0.3 | 0.03 |
| <b>C4</b>                                                | 248  | 17  | 1250 | 41  | 8.13  | <b>C4</b>   | 4.4  | 4.0 | 5.8 | 0.2 | 0.03 |
| <b>C5</b>                                                | 228  | 33  | 179  | 19  | 3.87  | <b>C5</b>   | 4.8  | 4.2 | 6.4 | 0.2 | 0.03 |
| <b>C6</b>                                                | 291  | 58  | 697  | 45  | 8.79  | <b>C6</b>   | 5.4  | 2.9 | 6.5 | 0.3 | 0.04 |
| <b>C7</b>                                                | 246  | 87  | 397  | 38  | 7.54  | <b>C7</b>   | 4.9  | 4.2 | 6.1 | 0.3 | 0.03 |
| <b>C9</b>                                                | 303  | 106 | 597  | 55  | 10.84 | <b>C9</b>   | 5.7  | 4.8 | 6.6 | 0.3 | 0.04 |
| <b>C10</b>                                               | 288  | 67  | 720  | 40  | 7.81  | <b>C10</b>  | 5.2  | 4.3 | 6.4 | 0.4 | 0.04 |
| <b>C12</b>                                               | 277  | 96  | 373  | 39  | 7.66  | <b>C12</b>  | 5.5  | 4.6 | 6.5 | 0.3 | 0.04 |
| <b>C13</b>                                               | 284  | 124 | 470  | 54  | 10.58 | <b>C13</b>  | 5.5  | 5.0 | 6.4 | 0.2 | 0.02 |
| <b>C14</b>                                               | 338  | 162 | 889  | 35  | 6.93  | <b>C14</b>  | 6.2  | 4.5 | 6.8 | 0.1 | 0.02 |
| <b>C15</b>                                               | 324  | 132 | 1745 | 37  | 7.27  | <b>C15</b>  | 6.3  | 4.5 | 6.9 | 0.1 | 0.03 |
| <b>C16</b>                                               | 383  | 133 | 605  | 66  | 12.95 | <b>C16</b>  | 6.5  | 5.6 | 7.2 | 0.1 | 0.03 |
| <b>C20</b>                                               | 495  | 219 | 1190 | 63  | 12.66 | <b>C20</b>  | 6.4  | 4.4 | 6.9 | 0.1 | 0.02 |
| <b>P</b>                                                 | 70   | 4   | 1214 | 145 |       | <b>P</b>    | (-)  | (-) | (-) |     |      |

50

<sup>a</sup> Average yearly cation signature, sub-catchments been mire adjusted according to Eq. 3
