# Supplementary material for: Linking groundwater travel times to stream chemistry, isotopic composition and catchment characteristics
Source: Copernicus journal article supplement (doi:10.5194/hess-2020-121), 2020-04-01
Supplement: Supplementary file 2 [file hess-2020-121-supplement.zip]

## Supporting information 2 – Statistics of travel time distribution and field observations

Statistics of multiple regression between mean travel times (MTT), on one hand, and slope, groundwater travel distance (MTD), and the proportion of low conductive sediments (LCS). The statistics are based on MTT and equations 4 and 5 (Table S2).

5 **Table S2:** Regression statistics of Eq 4 and Eq 5

| <b>Regression statistics of Eq 4</b> |                     |                       |                          |                       |                       |
|--------------------------------------|---------------------|-----------------------|--------------------------|-----------------------|-----------------------|
|                                      | <b>Multiple R</b>   | <b>R Square</b>       | <b>Adjusted R Square</b> | <b>Standard Error</b> | <b>Observations</b>   |
| <b>ANOVA</b>                         | 0.95                | 0.90                  | 0.88                     | 0.31                  | 14                    |
|                                      | <b>df</b>           | <b>SS</b>             | <b>MS</b>                | <b>F</b>              | <b>Significance F</b> |
| <b>Regression</b>                    | 2                   | 9.5                   | 4.8                      | 48.2                  | 3.6E-06               |
| <b>Residual</b>                      | 11                  | 1.1                   | 0.1                      |                       |                       |
| <b>Total</b>                         | 13                  | 10.6                  |                          |                       |                       |
|                                      | <b>Coefficients</b> | <b>Standard Error</b> | <b>t Stat</b>            | <b>P-value</b>        |                       |
| <b>Intercept</b>                     | -0.33               | 0.50                  | -0.66                    | 0.52                  |                       |
| <b>LCS (%)</b>                       | 0.31                | 0.11                  | 2.99                     | 0.01                  |                       |
| <b>Slope (°)</b>                     | 0.08                | 0.01                  | 6.30                     | 0.00                  |                       |
| <b>Regression statistics of Eq 5</b> |                     |                       |                          |                       |                       |
|                                      | <b>Multiple R</b>   | <b>R Square</b>       | <b>Adjusted R Square</b> | <b>Standard Error</b> | <b>Observations</b>   |
| <b>ANOVA</b>                         | 0.95                | 0.90                  | 0.88                     | 0.32                  | 14                    |
|                                      | <b>df</b>           | <b>SS</b>             | <b>MS</b>                | <b>F</b>              | <b>Significance F</b> |
| <b>Regression</b>                    | 2                   | 9.53                  | 4.76                     | 47.71                 | 3.8E-06               |
| <b>Residual</b>                      | 11                  | 1.10                  | 0.10                     |                       |                       |
| <b>Total</b>                         | 13                  | 10.62                 |                          |                       |                       |
|                                      | <b>Coefficients</b> | <b>Standard Error</b> | <b>t Stat</b>            | <b>P-value</b>        |                       |
| <b>Intercept</b>                     | 0.19                | 0.34                  | 0.57                     | 0.58                  |                       |
| <b>LCS (%)</b>                       | 0.01                | 0.00                  | 2.96                     | 0.01                  |                       |
| <b>MTD (m)</b>                       | 0.08                | 0.01                  | 5.87                     | 0.00                  |                       |
